# Supplementary material for: Facile Conversion of Polystyrene Waste into an Efficient Sorbent for Water Purification
Source: MDPI journal article supplement (doi:10.3390/polym14214477), 2022-10-22
Supplement: s1 [file s1]

# **Supporting Information**

## **Facile Conversion of Polystyrene Waste into an Efficient Sorbent for Water Purification**

Cuizhu Ye,<sup>†, 1</sup> Ziyang Pan,<sup>†, 1</sup> and Yi Shen<sup>\*, †</sup>

<sup>†</sup> School of Food Science and Technology, South China University of Technology, Guangzhou, 510640, China.

<sup>1</sup> The authors contributed equally to this work.

Correspondence: \*feishen@scut.edu.cn (Y. S.)

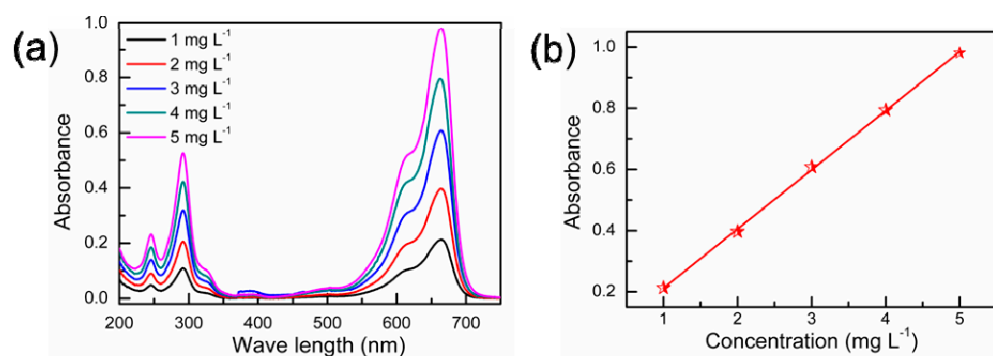

**Figure S1** (a) UV spectra of methylene blue, and (b) resulting calibrated curves.

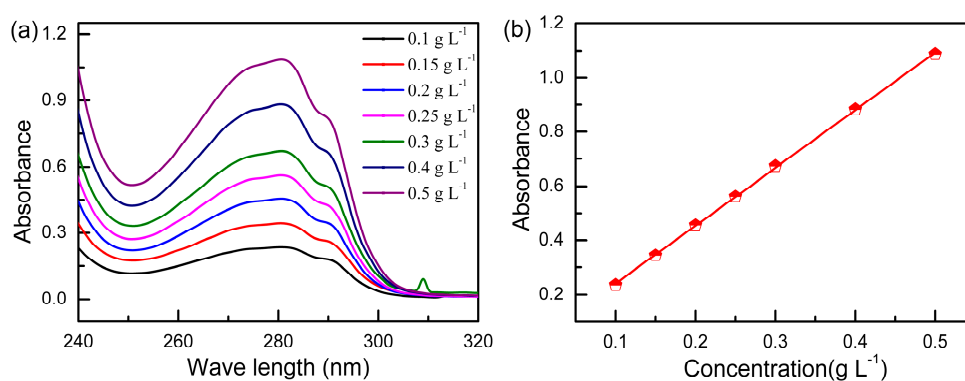

**Figure S2** (a) UV spectra of lysozyme, and (b) resulting calibrated curves.

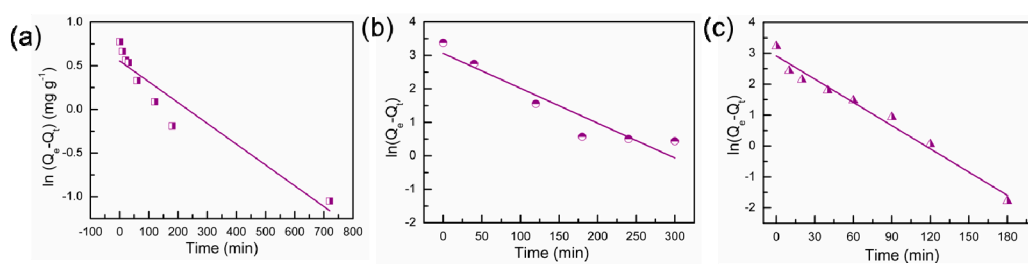

**Figure S3** Adsorption fitting curves of (a)  $\text{Pb}^{2+}$ , (b) lysozyme and (c) methylene blue by the pseudo-first-order equation.

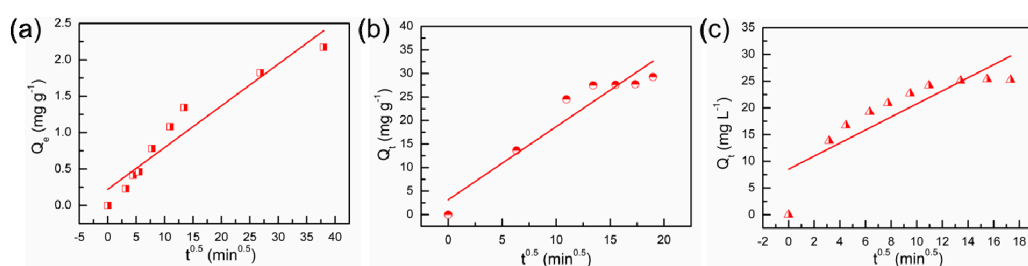

**Figure S4** Adsorption fitting curves of (a)  $\text{Pb}^{2+}$ , (b) lysozyme and (c) methylene blue by intraparticle diffusion equation.
